# Supplementary material for: Long-term trends in Anopheles gambiae insecticide resistance in Côte d’Ivoire
Source: PubMed Central journal article supplement (PMC4269959; doi:10.1186/s13071-014-0500-z), 2014-11-28
Supplement: 13071_2014_500_MOESM1_ESM.pdf [file 13071_2014_500_MOESM1_ESM.pdf]

**Additional file 1.** Prevalence of insecticide resistance in *An. gambiae* s.s from Tiassalé, Sikensi, Divo and Agboville in 2013 in Côte d'Ivoire.

| Strains   | Insecticides             | No. tested | Dead | Mortality (%)    | status |
|-----------|--------------------------|------------|------|------------------|--------|
| Sikensi   | bendiocarb (0.1%)        | 108        | 61   | 56.5 (46.6-66.0) | R      |
|           | fenitrothion (1.0%)      | 111        | 99   | 89.2 (81.9-94.3) | R      |
|           | Deltamethrin (0.05%)     | 81         | 42   | 51.8 (40.5-63.1) | R      |
| Divo      | bendiocarb (0.1%)        | 199        | 155  | 77.9 (71.5-83.4) | R      |
|           | fenitrothion (1.0%)      | 196        | 192  | 98.0 (94.9-99.4) | S      |
|           | Deltamethrin (0.05%)     | 99         | 64   | 64.6 (54.4-74.0) | R      |
|           | primiphos methyl (0.25%) | 48         | 21   | 43.8 (29.5-58.8) | R      |
| Agboville | bendiocarb (0.1%)        | 116        | 8    | 6.9 (3.0-13.1)   | R      |
|           | fenitrothion (1.0%)      | 103        | 64   | 62.1 (52.0-71.5) | R      |
|           | Deltamethrin (0.05%)     | 116        | 73   | 62.9 (53.5-71.7) | R      |
|           | primiphos methyl (0.25%) | 94         | 15   | 16.0 (9.2-24.9)  | R      |
| Tiassale  | primiphos methyl (0.2%)  | 100        | 63   | 63.0 (52.8-72.4) | R      |
|           | primiphos methyl (0.25%) | 100        | 68   | 68.0 (57.9-77)   | R      |

Data were collected by the AvecNet research programme between May 2012 and March 2013. All percentages are calculated from total mosquito tested (No. tested) with 95% confidence intervals. Resistant population = R; suspected resistant population = R/S
