# Supplementary material for: Long-term trends in Anopheles gambiae insecticide resistance in Côte d’Ivoire
Source: PubMed Central journal article supplement (PMC4269959; doi:10.1186/s13071-014-0500-z), 2014-11-28
Supplement: 13071_2014_500_MOESM4_ESM.pdf [file 13071_2014_500_MOESM4_ESM.pdf]

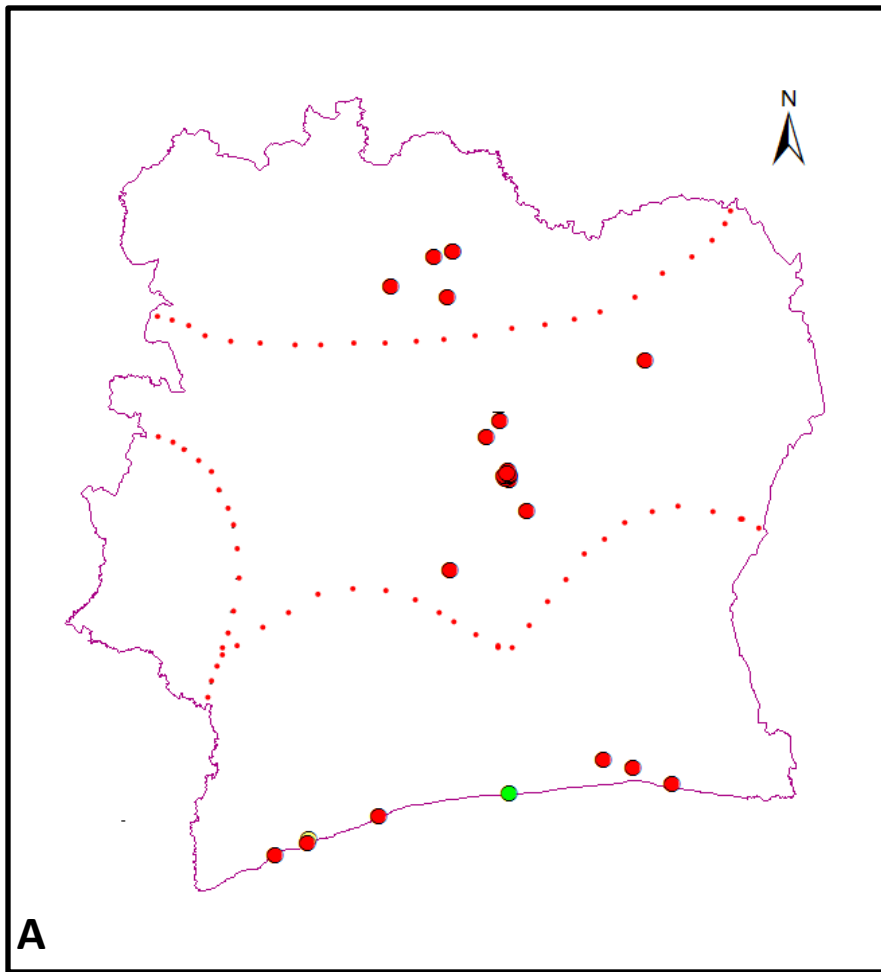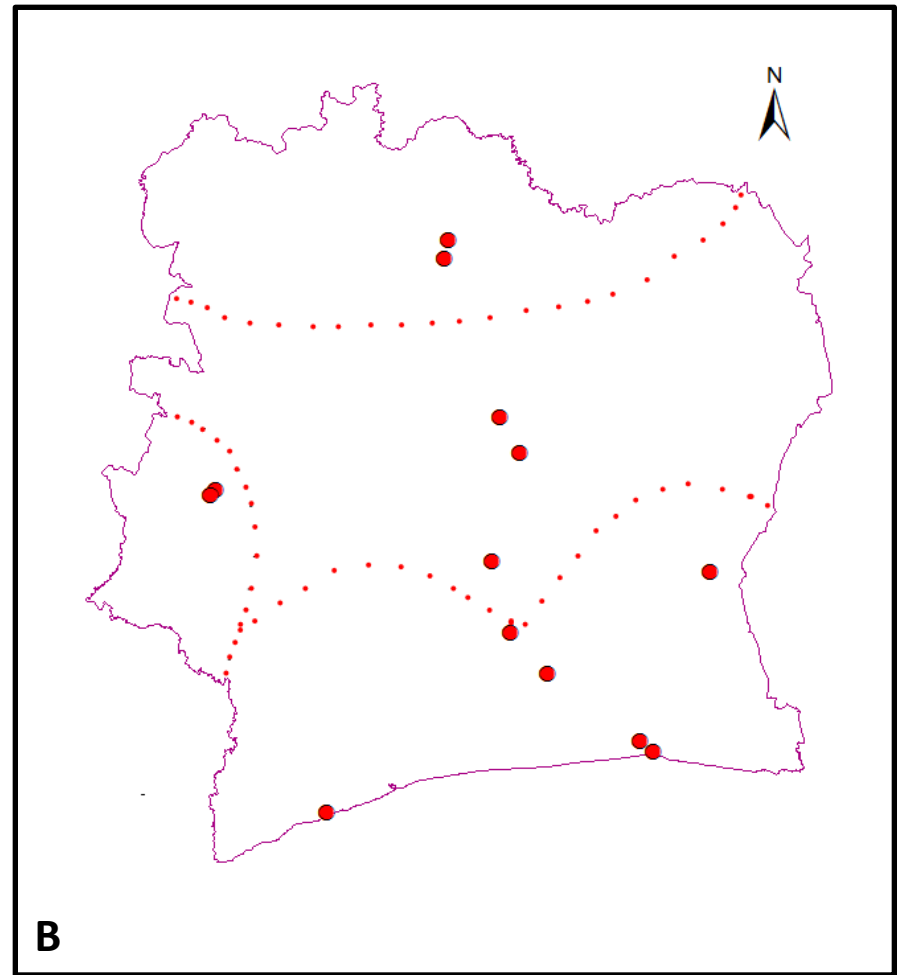

-  No resistance
-  Suspected resistance
-  Confirmed resistance

0 55 110 220 Kilometers
